# Supplementary material
Source: publisher figshare collection journal article supplement (https://gsajournals.figshare.com/ndownloader/files/12349445)
Supplement: Supplementary file 1 [file 12349445]

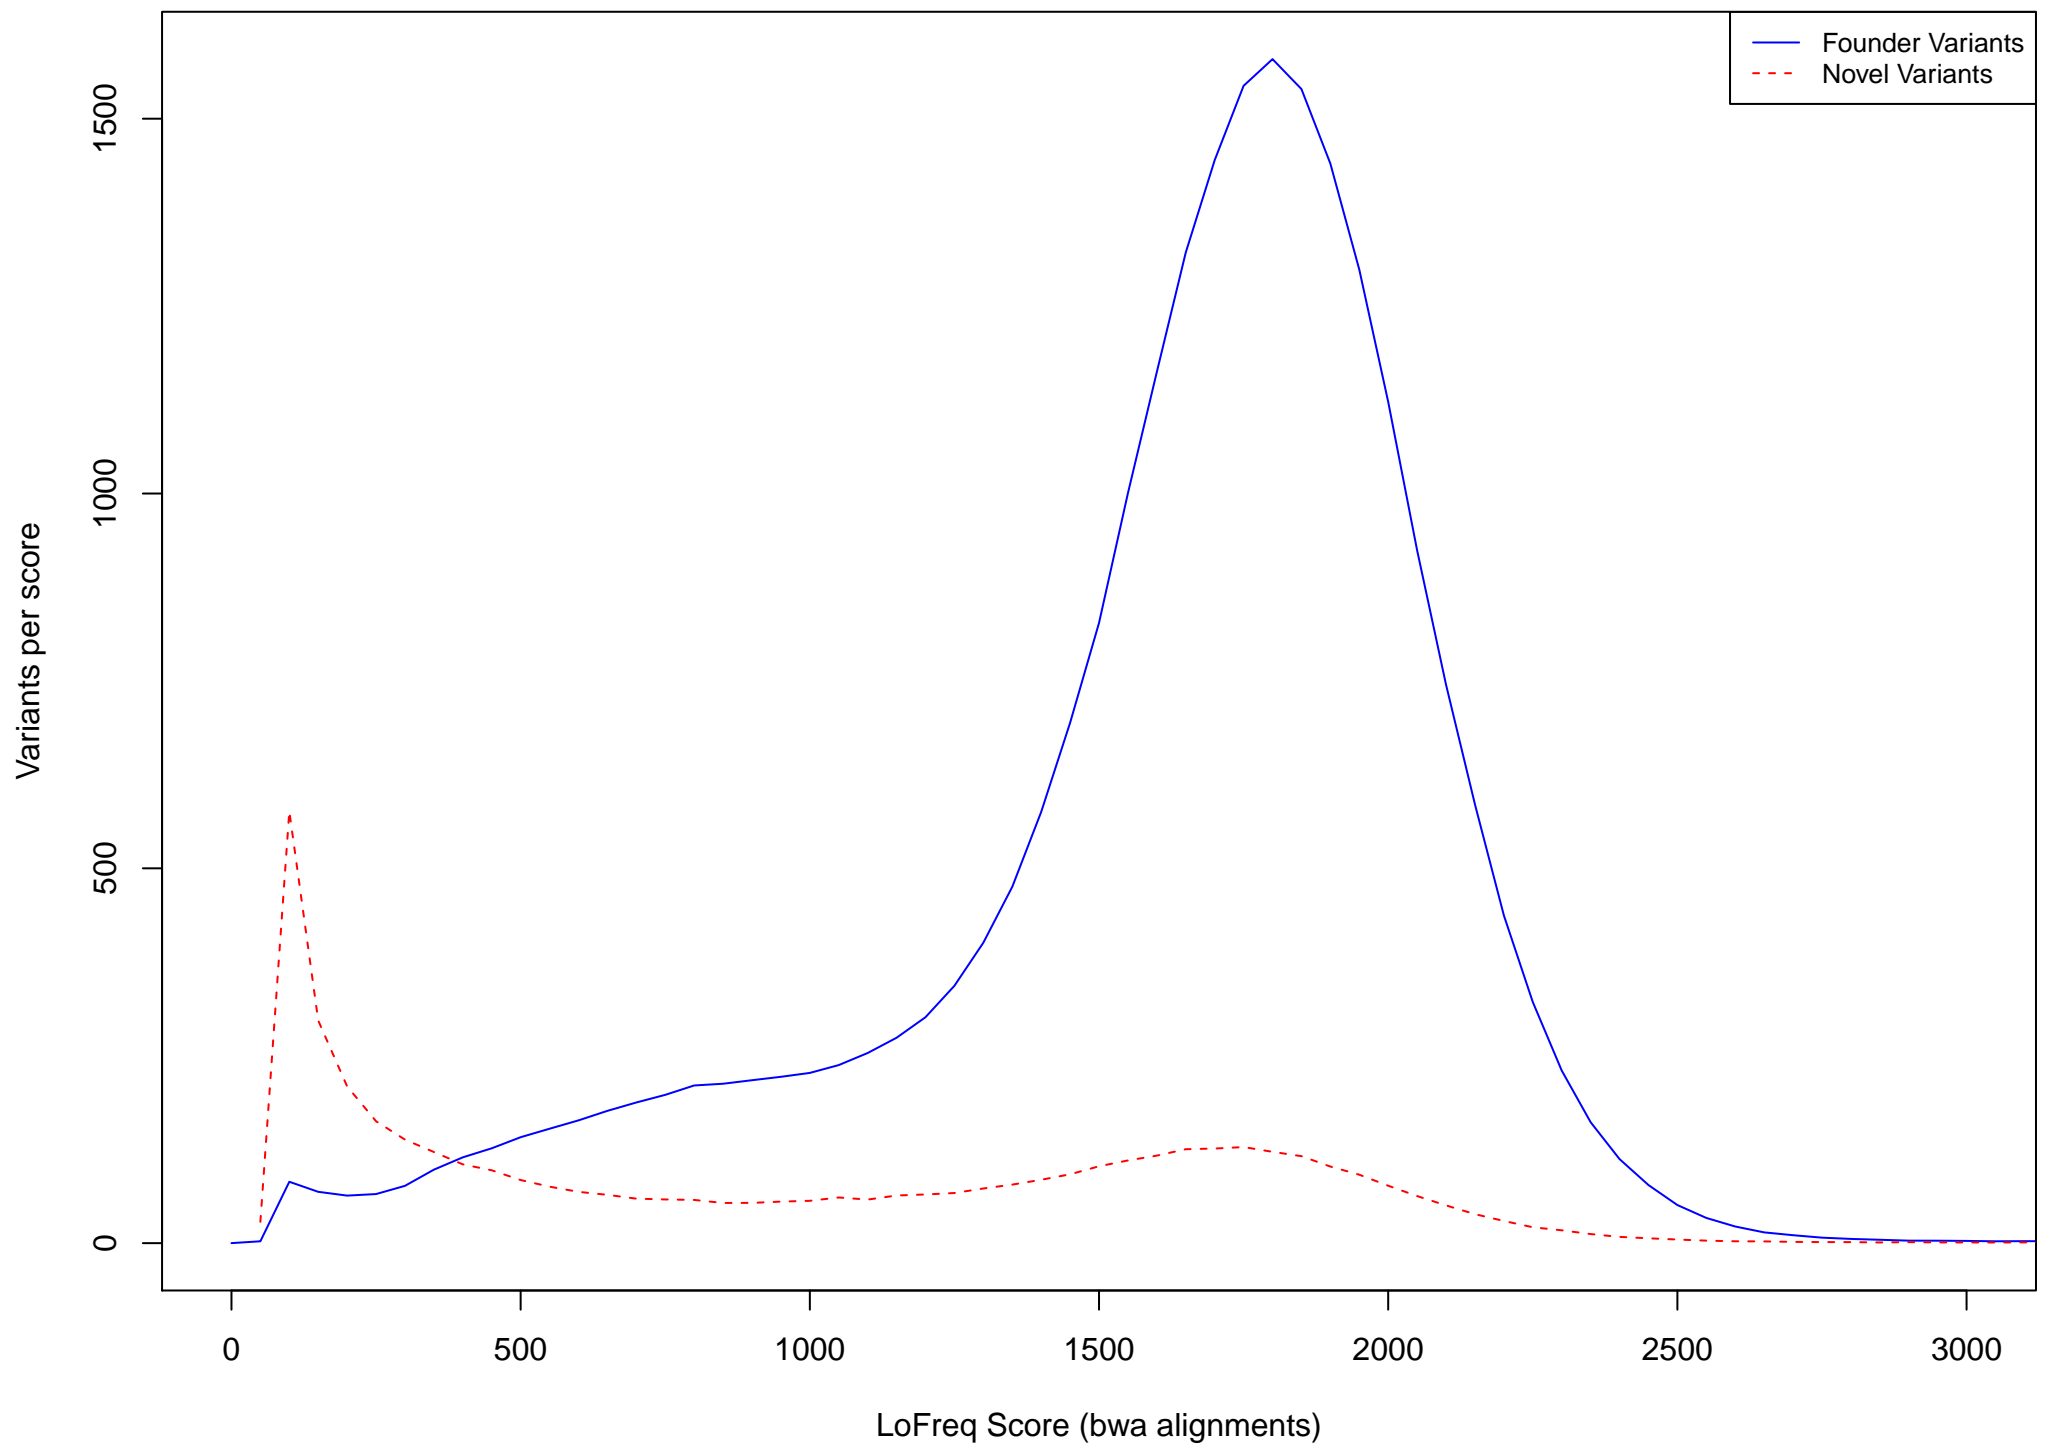

**Figure S2.** Plot of LoFreq score distributions for known and novel variants. The plot compares the scores of known DGRP variants versus novel variants detected by LoFreq.
